# Supplementary material for: A Shigella species variant is causally linked to intractable functional constipation
Source: PubMed Central journal article supplement (PMC9282927; doi:10.1172/jci150097), 2022-07-15
Supplement: jci-132-150097-s056.pdf [file jci-132-150097-s056.pdf]

A

```
GCAAAATATAACATCTGCCCGAACGTTGATTTTATGGCGACACAACCTAACTACCGGGCGCATTAAACG
CACTATCTGTGTCATCCGGAGAGCTTTACTTACAAACTGCCCCACAATATGGACACGATGGAAGGGGC
GCTGGTGGAGCCTGCCGCAGTCGGGATGCATGCCGCGATGCTGGCAGATGTTAAACCGGGTAAGAAGA
TAATTATTCTGGGAGCGGGTTGATTGGTTTGATGACGTTGCAAGC
```

B

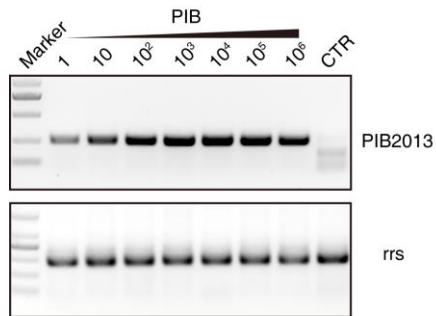

C

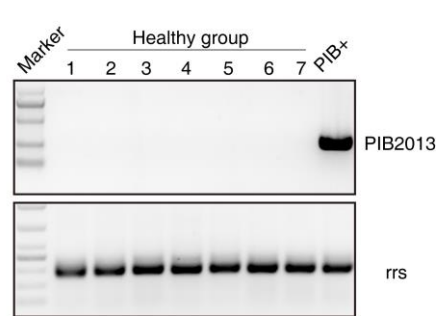

**Supplemental Figure 1. PIB2013 specifically detected PIB presence from stool.**

Different amount of PIB bacteria were mixed with stool from a healthy adult (CTR) and the resultant bacterial mixtures were subjected to PIB2013 assay. (A) The target sequence of PIB genome for PIB2013 assay. (B) A typical PCR assay for PIB-containing samples (PIB<sup>+</sup>). (C) A typical PCR assay for CTR samples. rrs was used as the internal control.
